# Supplementary material for: Mimicking clinical trials with synthetic acute myeloid leukemia patients using generative artificial intelligence
Source: PubMed Central journal article supplement (PMC10954666; doi:10.1038/s41746-024-01076-x), 2024-03-20
Supplement: 41746_2024_1076_MOESM1_ESM.pdf [file 41746_2024_1076_MOESM1_ESM.pdf]

## Supplements

| performance metric                | original cohort | CTAB-GAN+ | NFLOW |
|-----------------------------------|-----------------|-----------|-------|
| Log-transformed Correlation Score | 0.58            | 0.75      | 0.74  |
| Regularized Support Coverage      | 0.93            | 0.95      | 0.97  |
| Basic Statistical Measure         | 0.95            | 0.91      | 0.92  |
| Optimism (OS)                     | 1.00            | 0.97      | 0.98  |
| Optimism (EFS)                    | 0.99            | 0.96      | 0.97  |
| Kaplan-Meier Divergence (OS)      | 1.00            | 0.98      | 0.99  |
| Kaplan-Meier Divergence (EFS)     | 0.99            | 0.94      | 0.96  |
| Short-Sightedness (OS)            | 0.94            | 0.99      | 0.93  |
| Short-Sightedness (EFS)           | 0.94            | 0.98      | 0.88  |

**Supplementary Table 1 Performance evaluation of both generative models.** Previously proposed performance metrics for tabular synthetic data (introduced by Chundawat et al.<sup>9</sup> and Norcliffe et al.<sup>11</sup>) were used to evaluate model performance. All metrics are scaled from 0 (inadequate representation of original data) to 1 (optimal representation).

| Trial        | train (n) | test (n) | <i>p</i> |
|--------------|-----------|----------|----------|
| AML96        | 766       | 183      | 0.567    |
| AML60+       | 39        | 6        | 1.000    |
| AML2003      | 146       | 42       | 0.380    |
| SORAML       | 182       | 47       | 0.788    |
| AML registry | 158       | 37       | 0.923    |

**Supplementary Table 2 Patient distribution according to source trial between training and test set.**

|                                 |                          | original cohort | CTAB-GAN+  | <i>p</i> | NFlow      | <i>p</i> |
|---------------------------------|--------------------------|-----------------|------------|----------|------------|----------|
| number of patients              |                          | 1606            | 1606       |          | 1606       |          |
| <b>molecular genetics, n(%)</b> |                          |                 |            |          |            |          |
| epigenetic                      | <i>ASXL1</i>             | 126 (7.9)       | 161 (10.0) | 0.035    | 113 (7.0)  | 0.420    |
|                                 | <i>BCOR</i>              | 76 (4.7)        | 78 (4.9)   | 0.934    | 72 (4.5)   | 0.801    |
|                                 | <i>BCORL1</i>            | 60 (3.7)        | 59 (3.7)   | 1.000    | 182 (11.3) | 0.000    |
|                                 | <i>DNTM3A</i>            | 458 (28.5)      | 413 (25.7) | 0.081    | 547 (34.0) | 0.001    |
|                                 | <i>EZH2</i>              | 63 (3.9)        | 75 (4.7)   | 0.339    | 63 (3.9)   | 1.000    |
|                                 | <i>IDH1</i>              | 149 (9.3)       | 156 (9.7)  | 0.718    | 149 (9.3)  | 1.000    |
|                                 | <i>IDH2</i>              | 227 (14.1)      | 214 (13.3) | 0.538    | 278 (17.3) | 0.015    |
|                                 | <i>TET2</i>              | 311 (19.4)      | 313 (19.5) | 0.964    | 308 (19.2) | 0.929    |
| transcription                   | <i>CEBPA</i>             | 257 (16.0)      | 323 (20.1) | 0.002    | 268 (16.7) | 0.503    |
|                                 | <i>CEBPA</i> . biallelic | 92 (5.7)        | 132 (8.2)  | 0.001    | 89 (5.5)   | 0.878    |
|                                 | <i>CEBPA</i> -TAD        | 37 (2.3)        | 50 (3.1)   | 0.102    | 24 (1.5)   | 0.194    |
|                                 | <i>CEBPA</i> -bZIP       | 144 (9.0)       | 206 (12.8) | 0.851    | 127 (7.9)  | 0.001    |
|                                 | <i>CUX1</i>              | 44 (2.7)        | 86 (5.4)   | <0.001   | 48 (3.0)   | 0.751    |
|                                 | <i>GATA2</i>             | 97 (6.0)        | 159 (9.9)  | <0.001   | 109 (6.8)  | 0.428    |
|                                 | <i>IKZF1</i>             | 45 (2.8)        | 39 (2.4)   | 0.581    | 37 (2.3)   | 0.434    |
|                                 | <i>PHF6</i>              | 52 (3.2)        | 65 (4.1)   | 0.258    | 109 (6.8)  | 0.000    |
|                                 | <i>RUNX1</i>             | 147 (9.2)       | 159 (9.9)  | 0.509    | 156 (9.7)  | 0.629    |

|           |                 |            |            |       |            |       |
|-----------|-----------------|------------|------------|-------|------------|-------|
|           | <i>WT1</i>      | 118 (7.4)  | 80 (5.0)   | 0.007 | 117 (7.3)  | 1.000 |
| signaling | <i>CBL</i>      | 32 (2.0)   | 44 (2.7)   | 0.201 | 28 (1.7)   | 0.696 |
|           | <i>CSF3R</i>    | 29 (1.8)   | 44 (2.7)   | 0.097 | 33 (2.1)   | 0.701 |
|           | <i>FLT3-ITD</i> | 349 (21.7) | 347 (21.6) | 1.000 | 363 (22.6) | 0.496 |
|           | <i>FLT3-TKD</i> | 62 (3.9)   | 53 (3.3)   | 0.633 | 94 (5.9)   | 0.004 |
|           | <i>JAK2</i>     | 18 (1.1)   | 23 (1.4)   | 0.530 | 22 (1.4)   | 0.634 |
|           | <i>KIT</i>      | 79 (4.9)   | 97 (6.0)   | 0.187 | 75 (4.7)   | 0.804 |
|           | <i>KRAS</i>     | 85 (5.3)   | 115 (7.2)  | 0.034 | 77 (4.8)   | 0.573 |
|           | <i>NOTCH1</i>   | 32 (2.0)   | 39 (2.4)   | 0.472 | 43 (2.7)   | 0.242 |
|           | <i>NRAS</i>     | 249 (15.5) | 305 (19.0) | 0.010 | 198 (12.3) | 0.011 |
|           | <i>PTPN11</i>   | 113 (7.0)  | 119 (7.4)  | 0.733 | 102 (6.4)  | 0.480 |
| splicing  | <i>SF3B1</i>    | 46 (2.9)   | 48 (3.0)   | 0.917 | 41 (2.7)   | 0.664 |
|           | <i>SRSF2</i>    | 102 (6.4)  | 101 (6.3)  | 1.000 | 138 (8.6)  | 0.019 |
|           | <i>U2AF1</i>    | 45 (2.8)   | 51 (3.2)   | 0.605 | 45 (2.8)   | 1.000 |
|           | <i>ZRSR2</i>    | 26 (1.6)   | 20 (1.3)   | 0.458 | 64 (4.0)   | 0.000 |
| cohesin   | <i>RAD21</i>    | 51 (3.2)   | 58 (3.6)   | 0.559 | 44 (2.7)   | 0.532 |
|           | <i>SMC1A</i>    | 23 (1.4)   | 26 (1.6)   | 0.774 | 22 (1.4)   | 1.000 |
|           | <i>SMC3</i>     | 18 (1.1)   | 31 (1.9)   | 0.083 | 37 (2.3)   | 0.014 |

|       |              |            |            |       |            |       |
|-------|--------------|------------|------------|-------|------------|-------|
|       | <i>STAG2</i> | 88 (5.5)   | 69 (4.3)   | 0.141 | 132 (8.2)  | 0.003 |
| other | <i>TP53</i>  | 114 (7.1)  | 100 (6.2)  | 0.358 | 115 (7.2)  | 1.000 |
|       | <i>NPM1</i>  | 501 (31.2) | 507 (31.6) | 0.819 | 508 (31.6) | 0.674 |

---

**cytogenetics. n (%)**

|                        |            |            |       |            |       |
|------------------------|------------|------------|-------|------------|-------|
| normal<br>karyotype    | 830 (51.7) | 780 (48.6) | 0.085 | 788 (49.1) | 0.143 |
| complex<br>karyotype   | 188 (11.7) | 209 (13.0) | 0.280 | 229 (14.3) | 0.072 |
| t(8;21)                | 61 (3.8)   | 90 (5.6)   | 0.019 | 71 (4.4)   | 0.424 |
| inv(16) or<br>t(16;16) | 101 (6.3)  | 101 (6.3)  | 1.000 | 89 (5.5)   | 0.371 |
| t(6;9)                 | 6 (0.4)    | 5 (0.3)    | 0.774 | 11 (0.7)   | 0.331 |
| inv(3) or t(3;3)       | 7 (0.4)    | 17 (1.1)   | 0.063 | 10 (0.6)   | 0.628 |
| t(9;11)                | 11 (0.7)   | 22 (1.4)   | 0.079 | 22 (1.4)   | 0.079 |
| t(v;11)                | 16 (1.0)   | 34 (2.1)   | 0.015 | 15 (0.9)   | 0.859 |
| t(9;22)                | 3 (0.2)    | 3 (0.2)    | 1.000 | 12 (0.8)   | 0.035 |
| -5                     | 24 (1.5)   | 28 (1.7)   | 0.675 | 31 (1.9)   | 0.415 |
| del(5q)                | 18 (1.1)   | 23 (1.4)   | 0.530 | 20 (1.3)   | 0.871 |
| -7                     | 71 (4.4)   | 83 (5.2)   | 0.364 | 92 (5.7)   | 0.108 |

|          |          |          |       |          |       |
|----------|----------|----------|-------|----------|-------|
| del(7q)  | 16 (1.0) | 15 (0.9) | 0.859 | 36 (2.2) | 0.007 |
| -17      | 34 (2.1) | 38 (2.4) | 0.721 | 21 (1.3) | 0.079 |
| abn(17p) | 6 (0.4)  | 13 (0.8) | 0.166 | 18 (1.1) | 0.022 |

**Supplementary Table 3 Distribution of molecular and cytogenetic alterations between the original and the synthetic cohorts.** *p*-values are calculated using two-sample comparisons between each of the synthetic cohorts and the baseline cohort for reference. Abbreviations: number (n).

|                                              | <b>original cohort</b> | <b>CTAB-GAN+</b> | <b>NFLOW</b> |
|----------------------------------------------|------------------------|------------------|--------------|
| patients with OS > 5 years                   | 362 (22.8%)            | 409 (25.5%)      | 343 (21.4%)  |
| patients with EFS > 5 years                  | 265 (16.7%)            | 356 (22.2%)      | 275 (17.1%)  |
| patients with OS > 5 years AND EFS < 5 years | 97 (6.1%)              | 53 (3.3%)        | 68 (4.2%)    |

**Supplementary Table 4 Number of patients with very long event-free and overall survival.**

|                        | <b>original</b> | <b><i>p</i></b> | <b>CTAB-<br/>GAN+</b> | <b><i>p</i></b> | <b>NFlow</b> | <b><i>p</i></b> |
|------------------------|-----------------|-----------------|-----------------------|-----------------|--------------|-----------------|
| age                    | 0.94            | <0.001          | 0.94                  | <0.001          | 0.95         | <0.001          |
|                        | [0.93-0.95]     |                 | [0.93-0.95]           |                 | [0.94-0.95]  |                 |
| normal<br>karyotype    | 1.98            | <0.001          | 2.22                  | <0.001          | 1.50         | <0.001          |
|                        | [1.58-2.49]     |                 | [1.75-2.81]           |                 | [1.20-1.88]  |                 |
| complex<br>karyotype   | 0.40            | <0.001          | 0.39                  | <0.001          | 0.58         | <0.001          |
|                        | [0.29-0.54]     |                 | [0.29-0.53]           |                 | [0.43-0.77]  |                 |
| inv(16) or<br>t(16;16) | 3.25            | <0.001          | 1.82                  | 0.028           | 2.73         | 0.001           |
|                        | [1.76-5.99]     |                 | [1.07-3.10]           |                 | [1.50-4.97]  |                 |
| t(8;21)                | 8.38            | <0.001          | 3.37                  | 0.001           | 3.20         | 0.001           |
|                        | [2.61-26.89]    |                 | [1.68-6.77]           |                 | [1.58-6.49]  |                 |
| t(9;11)                | 1.87            | 0.424           | 1.21                  | 0.704           | 0.78         | 0.576           |
|                        | [0.40-8.69]     |                 | [0.45-3.31]           |                 | [0.32-1.87]  |                 |
| -5                     | 0.13            | <0.001          | 0.16                  | <0.001          | 0.24         | <0.001          |
|                        | [0.05-0.34]     |                 | [0.07-0.36]           |                 | [0.11-0.50]  |                 |
| del(5q)                | 0.33            | 0.019           | 0.07                  | <0.001          | 0.67         | 0.378           |
|                        | [0.13-0.83]     |                 | [0.02-0.21]           |                 | [0.27-1.64]  |                 |
| -7                     | 0.25            | <0.001          | 0.24                  | <0.001          | 0.20         | <0.001          |
|                        | [0.15-0.41]     |                 | [0.15-0.37]           |                 | [0.13-0.32]  |                 |
| -17                    | 0.12            | <0.001          | 0.10                  | <0.001          | 0.33         | 0.013           |
|                        | [0.05-0.27]     |                 | [0.05-0.22]           |                 | [0.14-0.79]  |                 |
| <i>NPM1</i>            | 2.49            | <0.001          | 2.80                  | <0.001          | 1.69         | <0.001          |
|                        | [1.91-3.24]     |                 | [2.11-3.70]           |                 | [1.33-2.15]  |                 |
| <i>FLT3</i> -ITD       | 1.79            | <0.001          | 2.12                  | <0.001          | 1.41         | 0.011           |
|                        | [1.35-2.39]     |                 | [1.55-2.91]           |                 | [1.08-1.84]  |                 |

|                |              |        |             |        |             |        |
|----------------|--------------|--------|-------------|--------|-------------|--------|
| <i>CEBPA</i> - | 8.12         | <0.001 | 4.88        | <0.001 | 3.56        | <0.001 |
| <i>bZIP</i>    | [3.56-18.57] |        | [2.47-9.67] |        | [1.78-7.15] |        |
| (inframe)      |              |        |             |        |             |        |
| <i>TP53</i>    | 0.14         | <0.001 | 0.17        | <0.001 | 0.17        | <0.001 |
|                | [0.09-0.22]  |        | [0.11-0.26] |        | [0.11-0.26] |        |
| <i>RUNX1</i>   | 0.30         | <0.001 | 0.20        | <0.001 | 0.54        | <0.001 |
|                | [0.21-0.42]  |        | [0.14-0.28] |        | [0.39-0.76] |        |
| <i>ASXL1</i>   | 0.35         | <0.001 | 0.42        | <0.001 | 0.46        | <0.001 |
|                | [0.25-0.51]  |        | [0.30-0.58] |        | [0.31-0.68] |        |

---

**Supplementary Table 5 Comparative univariable analyses for individual patient variables with respect to achievement of complete remission.** Variables with previously demonstrated impact on patient outcome were analyzed using univariable logistic regression. Their odds ratio (OR) and 95%-confidence interval (square brackets) as well as corresponding *p*-values are reported per cohort. Except for del(5q) being significantly associated with failure to achieve CR in the original cohort while this effect turned out to be non-significant in the NFlow-generated cohort, all other effects were of the same directionality and statistical significance. Importantly, no variable showed an inverted effect (for example, a favorable marker turning unfavorable in a synthetic cohort).

|                     | <b>original</b> | <b><i>p</i></b> | <b>CTAB-<br/>GAN+</b> | <b><i>p</i></b> | <b>NFlow</b> | <b><i>p</i></b> |
|---------------------|-----------------|-----------------|-----------------------|-----------------|--------------|-----------------|
| age                 | 1.03            | <0.001          | 1.03                  | <0.001          | 1.03         | <0.001          |
|                     | [1.03-1.03]     |                 | [1.03-1.03]           |                 | [1.03-1.04]  |                 |
| normal karyotype    | 0.82            | 0.001           | 0.85                  | 0.008           | 0.82         | 0.001           |
|                     | [0.73-0.93]     |                 | [0.76-0.96]           |                 | [0.73-0.92]  |                 |
| complex karyotype   | 1.64            | <0.001          | 1.68                  | <0.001          | 1.44         | <0.001          |
|                     | [1.39-1.93]     |                 | [1.43-1.98]           |                 | [1.23-1.69]  |                 |
| inv(16) or t(16;16) | 0.58            | <0.001          | 0.43                  | <0.001          | 0.58         | <0.001          |
|                     | [0.44-0.74]     |                 | [0.32-0.58]           |                 | [0.44-0.77]  |                 |
| t(8;21)             | 0.35            | <0.001          | 0.38                  | <0.001          | 0.41         | <0.001          |
|                     | [0.21-0.52]     |                 | [0.28-0.53]           |                 | [0.29-0.58]  |                 |
| t(9;11)             | 0.64            | 0.237           | 0.84                  | 0.525           | 1.19         | 0.481           |
|                     | [0.30-1.34]     |                 | [0.50-1.42]           |                 | [0.74-1.92]  |                 |
| -5                  | 3.53            | <0.001          | 3.92                  | <0.001          | 2.51         | <0.001          |
|                     | [2.35-5.30]     |                 | [2.68-5.72]           |                 | [1.72-3.69]  |                 |
| del(5q)             | 2.76            | <0.001          | 3.40                  | <0.001          | 1.76         | 0.018           |
|                     | [1.73-4.41]     |                 | [2.24-5.15]           |                 | [1.10-2.80]  |                 |
| -7                  | 2.82            | <0.001          | 3.10                  | <0.001          | 2.97         | <0.001          |
|                     | [2.20-3.61]     |                 | [2.47-3.90]           |                 | [2.37-3.71]  |                 |
| -17                 | 3.32            | <0.001          | 3.50                  | <0.001          | 1.97         | 0.004           |
|                     | [2.34-4.70]     |                 | [2.42-4.84]           |                 | [1.23-3.13]  |                 |
| <i>NPM1</i>         | 0.68            | <0.001          | 0.77                  | <0.001          | 0.73         | <0.001          |
|                     | [0.60-0.77]     |                 | [0.68-0.87]           |                 | [0.64-0.82]  |                 |
| <i>FLT3-ITD</i>     | 1.00            | 0.959           | 1.04                  | 0.564           | 0.95         | 0.461           |
|                     | [0.88-1.15]     |                 | [0.91-1.20]           |                 | [0.83-1.09]  |                 |



|                |             |        |             |        |             |        |
|----------------|-------------|--------|-------------|--------|-------------|--------|
| <i>CEBPA</i> - | 0.39        | <0.001 | 0.44        | <0.001 | 0.64        | 0.006  |
| bZIP           | [0.28-0.54] |        | [0.34-0.60] |        | [0.47-0.88] |        |
| (inframe)      |             |        |             |        |             |        |
| <i>TP53</i>    | 2.82        | <0.001 | 3.34        | <0.001 | 3.05        | <0.001 |
|                | [2.31-3.44] |        | [2.71-4.13] |        | [2.50-3.73] |        |
| <i>RUNX1</i>   | 1.88        | <0.001 | 1.95        | <0.001 | 1.76        | <0.001 |
|                | [1.57-2.24] |        | [1.63-2.31] |        | [1.48-2.10] |        |
| <i>ASXL1</i>   | 1.86        | <0.001 | 1.62        | <0.001 | 1.52        | <0.001 |
|                | [1.54-2.25] |        | [1.31-2.01] |        | [1.28-1.81] |        |

---

**Supplementary Table 6 Comparative univariable analyses for individual patient variables with respect to event-free survival.** Variables with previously demonstrated impact on patient outcome were analyzed using univariable logistic regression. Their Hazard Ratio (HR) and 95%-confidence interval (square brackets) as well as corresponding *p*-values are reported per cohort. No discrepancies between effect direction and statistical significances of effects were found between the original and both synthetic cohorts were found.

|                        | <b>original</b> | <i>p</i> | <b>CTAB-<br/>GAN+</b> | <i>p</i> | <b>NFlow</b> | <i>p</i> |
|------------------------|-----------------|----------|-----------------------|----------|--------------|----------|
| age                    | 1.04            | <0.001   | 1.03                  | <0.001   | 1.04         | <0.001   |
|                        | [1.03-1.04]     |          | [1.03-1.04]           |          | [1.03-1.05]  |          |
| normal<br>karyotype    | 0.80            | 0.001    | 0.78                  | <0.001   | 0.81         | 0.001    |
|                        | [0.71-0.91]     |          | [0.69-0.88]           |          | [0.71-0.92]  |          |
| complex<br>karyotype   | 1.72            | <0.001   | 1.86                  | <0.001   | 1.42         | <0.001   |
|                        | [1.44-2.04]     |          | [1.58-2.20]           |          | [1.20-1.67]  |          |
| inv(16) or<br>t(16;16) | 0.52            | <0.001   | 0.41                  | <0.001   | 0.56         | <0.001   |
|                        | [0.39-0.70]     |          | [0.29-0.57]           |          | [0.41-0.78]  |          |
| t(8;21)                | 0.33            | <0.001   | 0.37                  | <0.001   | 0.41         | <0.001   |
|                        | [0.21-0.51]     |          | [0.26-0.53]           |          | [0.28-0.60]  |          |
| t(9;11)                | 0.60            | 0.247    | 0.88                  | 0.655    | 1.22         | 0.436    |
|                        | [0.25-1.43]     |          | [0.50-1.55]           |          | [0.74-2.04]  |          |
| -5                     | 4.37            | <0.001   | 4.30                  | <0.001   | 2.44         | <0.001   |
|                        | [2.90-6.57]     |          | [2.95-6.28]           |          | [1.66-3.57]  |          |
| del(5q)                | 2.32            | 0.001    | 3.22                  | <0.001   | 1.83         | 0.013    |
|                        | [1.41-3.80]     |          | [2.13-4.88]           |          | [1.14-2.96]  |          |
| -7                     | 2.79            | <0.001   | 3.16                  | <0.001   | 2.77         | <0.001   |
|                        | [2.17-3.58]     |          | [2.41-3.97]           |          | [2.21-3.46]  |          |

|                                      |             |        |             |        |             |        |
|--------------------------------------|-------------|--------|-------------|--------|-------------|--------|
| -17                                  | 3.68        | <0.001 | 3.46        | <0.001 | 1.91        | 0.008  |
|                                      | [2.59-5.21] |        | [2.49-4.79] |        | [1.19-3.09] |        |
| <i>NPM1</i>                          | 0.74        | <0.001 | 0.72        | <0.001 | 0.75        | <0.001 |
|                                      | [0.65-0.85] |        | [0.65-0.82] |        | [0.65-0.86] |        |
| <i>FLT3-ITD</i>                      | 1.06        | 0.440  | 1.01        | 0.853  | 0.95        | 0.468  |
|                                      | [0.92-1.22] |        | [0.87-1.18] |        | [0.82-1.10] |        |
| <i>CEBPA-<br/>bZIP<br/>(inframe)</i> | 0.41        | <0.001 | 0.42        | <0.001 | 0.68        | 0.027  |
|                                      | [0.28-0.59] |        | [0.31-0.57] |        | [0.48-0.96] |        |
| <i>TP53</i>                          | 3.44        | <0.001 | 3.65        | <0.001 | 2.75        | <0.001 |
|                                      | [2.81-4.21] |        | [2.85-4.52] |        | [2.24-3.37] |        |
| <i>RUNX1</i>                         | 1.82        | <0.001 | 1.92        | <0.001 | 1.69        | <0.001 |
|                                      | [1.51-2.19] |        | [1.61-2.30] |        | [1.41-2.03] |        |
| <i>ASXL1</i>                         | 1.64        | <0.001 | 1.55        | <0.001 | 1.68        | <0.001 |
|                                      | [1.35-2.01] |        | [1.29-1.87] |        | [1.36-2.08] |        |

---

**Supplementary Table 7 Comparative univariable analyses for individual patient variables with respect to overall survival.** Variables with previously demonstrated impact on patient outcome were analyzed using univariable logistic regression. Their Hazard Ratio (HR) and 95%-confidence interval (square brackets) as well as corresponding *p*-values are reported per cohort. No discrepancies between effect direction and statistical significances of effects were found between the original and both synthetic cohorts were found.

| <b>patient variable</b>          | <b>data type</b> |
|----------------------------------|------------------|
| <b>demographic/clinical</b>      |                  |
| age                              | continuous       |
| sex                              | binary           |
| AML status (de novo, sAML, tAML) | categorical      |
| extramedullary manifestations    | binary           |
| <b>laboratory values</b>         |                  |
| white blood cell count           | continuous       |
| hemoglobin level                 | continuous       |
| platelet count                   | continuous       |
| <b>outcome</b>                   |                  |
| achievement of CR                | binary           |
| EFS duration                     | continuous       |
| EFS status                       | binary           |
| OS duration                      | continuous       |
| OS status                        | binary           |
| <b>molecular genetics</b>        |                  |
| ASXL1                            | binary           |
| BCOR                             | binary           |
| BCORL1                           | binary           |
| DNTM3A                           | binary           |
| EZH2                             | binary           |
| IDH1                             | binary           |
| IDH2                             | binary           |
| TET2                             | binary           |
| RAD21                            | binary           |
| SMC1A                            | binary           |
| SMC3                             | binary           |
| STAG2                            | binary           |
| CEBPA                            | binary           |
| CEBPA-bZIP in frame              | binary           |
| CUX1                             | binary           |
| GATA2                            | binary           |
| IKZF1                            | binary           |
| PHF6                             | binary           |
| RUNX1                            | binary           |
| WT1                              | binary           |
| TP53                             | binary           |
| NPM1                             | binary           |
| CBL                              | binary           |
| CSF3R                            | binary           |
| FLT3-ITD                         | binary           |
| FLT3-TKD                         | binary           |
| JAK2                             | binary           |
| KIT                              | binary           |
| KRAS                             | binary           |
| NOTCH1                           | binary           |
| NRAS                             | binary           |
| PTPN11                           | binary           |
| SF3B1                            | binary           |
| SRSF2                            | binary           |

|       |        |
|-------|--------|
| U2AF1 | binary |
| ZRSR2 | binary |

**cytogenetics**

|                     |        |
|---------------------|--------|
| normal karyotype    | binary |
| complex karyotype   | binary |
| t(8;21)             | binary |
| inv(16) or t(16;16) | binary |
| t(6;9)              | binary |
| inv(3) or t(3;3)    | binary |
| t(9;11)             | binary |
| t(v;11)             | binary |
| t(9;22)             | binary |
| -5                  | binary |
| del(5q)             | binary |
| -7                  | binary |
| del(7q)             | binary |
| -17 or del(17p)     | binary |
| abn(17p)            | binary |

---

**Supplementary Table 8 Available patient variables included in synthetic data generation.**

Abbreviations: complete remission (CR), event-free survival (EFS), overall survival (OS), secondary acute myeloid leukemia (sAML), therapy-associated acute myeloid leukemia (tAML).

| <b>trial name</b> | <b>clinicaltrials.gov<br/>identifier</b> | <b>trial duration</b> | <b>protocol summary</b>                                                                                                                                                                                                                                                                                  |
|-------------------|------------------------------------------|-----------------------|----------------------------------------------------------------------------------------------------------------------------------------------------------------------------------------------------------------------------------------------------------------------------------------------------------|
| AML96             | NCT00180115                              | 1996-2008             | risk-adapted postremission treatment regarding allogeneic stem cell transplantation for high-risk AML and related allogeneic and autologous stem cell transplantation for standard-risk AML, and randomization between intermediate-dose and high-dose cytarabine within the first post-remission course |
| AML2003           | NCT00180102                              | 2003-2009             | early allogeneic stem cell transplantation in post-induction aplasia for high-risk AML, factorial design with four therapy arms with two factors of two stages (intensified vs. standard therapy and cytarabine vs. cytarabine + mitoxantrone + amsacrin)                                                |
| AML60+            | NCT00180167                              | 2005-2010             | Patients $\geq$ 60 years, mitoxantron on day 1,2,3 + cytarabine on days 1,3,5,7 vs. DA 7+3                                                                                                                                                                                                               |
| SORAML            | NCT00893373                              | 2011-2014             | Standard therapy + sorafenib vs. standard therapy + placebo                                                                                                                                                                                                                                              |

**Supplementary Table 9.** Summary of trial regimens

| <b>Variable</b> | <b>original</b> | <b>original</b> | <b>CTAB-</b> | <b>CTAB-</b> | <b>NFlow</b> | <b>NFlow</b> |
|-----------------|-----------------|-----------------|--------------|--------------|--------------|--------------|
|                 | <b>(n)</b>      | <b>(%)</b>      | <b>GAN+</b>  | <b>GAN+</b>  | <b>(n)</b>   | <b>(%)</b>   |
|                 |                 |                 | <b>(n)</b>   | <b>(%)</b>   |              |              |
| EXAML           | 138             | 8,68%           | 157          | 9,78%        | 110          | 6,85%        |
| AMLSTAT         | 18              | 1,13%           | 17           | 1,06%        | 73           | 4,55%        |
| <i>CEBPA</i>    | 64              | 4,03%           | 69           | 4,30%        | 83           | 5,17%        |
| <i>FLT3-ITD</i> | 25              | 1,57%           | 34           | 2,12%        | 37           | 2,30%        |
| <i>FLT3-TKD</i> | 519             | 32,64%          | 592          | 36,86%       | 570          | 35,49%       |
| <i>NPM1</i>     | 33              | 2,08%           | 37           | 2,30%        | 47           | 2,93%        |

**Supplementary Table 10 Missing values.** For two clinically assessed patient variables, extramedullary AML (EXAML) and AML status (AMLSTAT; de novo AML/sAML/tAML) values were missing from the original cohort. Additionally, for molecular alterations assessed via targeted sequencing, there were missing values. For all other variables, no missing values were present in the original data and therefore no missing values were generated by both models for these variables.

| Performance metric                       | Explanation                                                                                                                                                                                  | Reference        |
|------------------------------------------|----------------------------------------------------------------------------------------------------------------------------------------------------------------------------------------------|------------------|
| <b>Basic Statistical Measure</b>         | compares the mean, median, and standard deviation between numerical columns of both real and synthetic datasets to assess their similarity                                                   | Chundawat et al. |
| <b>Regularized Support Coverage</b>      | quantifies the overlap in individual feature distributions between the original and synthetic datasets, ensuring both share similar support for each feature                                 | Chundawat et al. |
| <b>Log-transformed Correlation Score</b> | evaluates the difference in correlation matrices between the original and synthetic datasets, which helps assess how well the synthetic data captures inter-feature relationships            | Chundawat et al. |
| <b>Kaplan-Meier Divergence</b>           | This metric calculates the mean absolute difference between the Kaplan-Meier survival curves of the synthetic and real data, measuring the overall match between the survival probabilities. | Norcliffe et al. |
| <b>Optimism</b>                          | This survival analysis metric measures the discrepancy in                                                                                                                                    | Norcliffe et al. |



expected lifetimes between the synthetic and real data, as illustrated by their respective Kaplan-Meier survival curves. It quantifies the degree of over-optimism or over-pessimism in the synthetic data

**Short-Sightedness**

This metric quantifies the extent to which models, as evaluated by Kaplan-Meier survival curves of synthetic data, fail to predict beyond a certain time horizon, capturing temporal limitations in the synthetic data

Norcliffe et al.

---

**Supplementary Table 11 Performance metrics for fidelity and usability of synthetic data.**

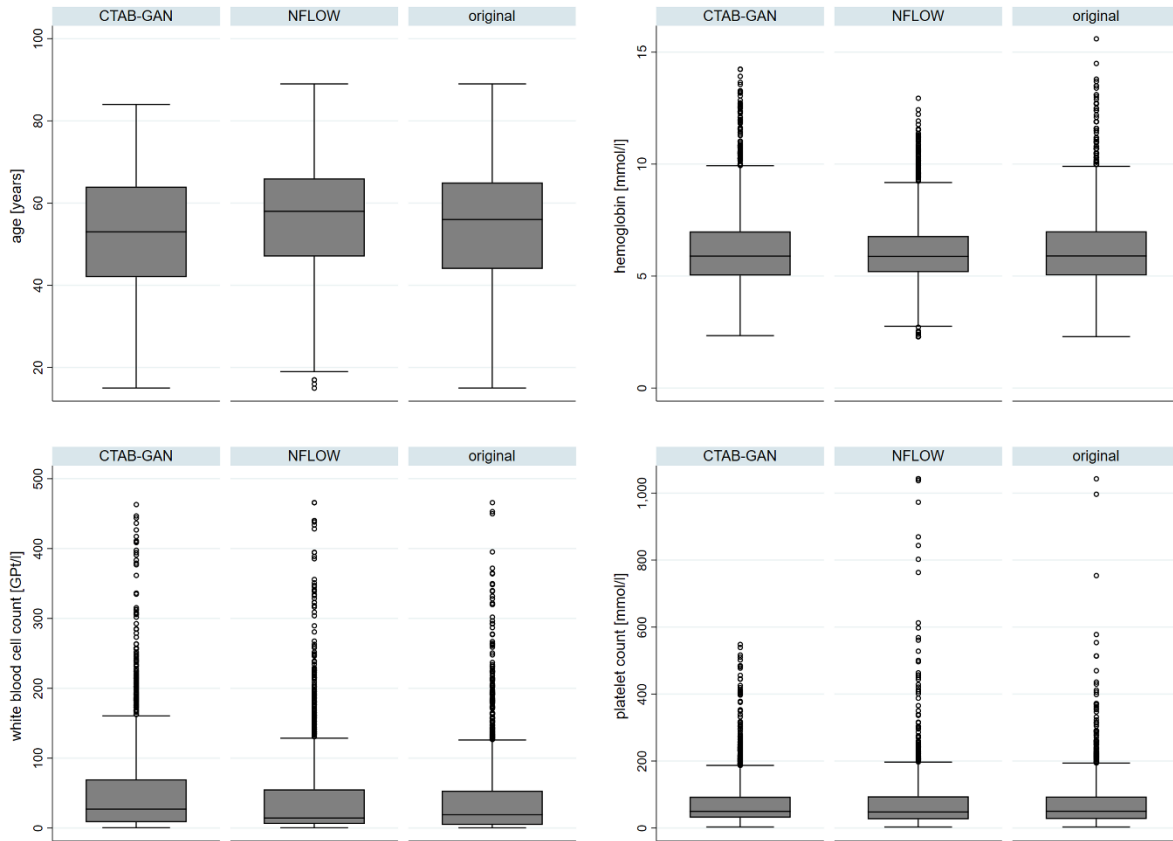

**Supplementary Figure 1 Representation of continuous variables by CTAB-GAN+ and NFlow.**

Boxplot: bold horizontal line = median; box = interquartile range (IQR, i.e. 25th to 75th percentile); lower whisker =  $Q1 - 1.5 * IQR$ ; upper whisker =  $Q3 + 1.5 * IQR$ ; dots = outliers. In the original data set, the number of patients with outlier values for continuous variables was gradually decreased towards the upper end of the spectrum as more extreme outliers are less likely. This behavior was better represented by NFlow than by CTAB-GAN+. For white blood cell count, CTAB-GAN+ seemed to even out the outliers across the upper distribution range resulting in a statistically significant difference compared to the original cohort (Tab. 1) whereas outliers for Nflow were more in line with the original cohort. For platelet count, CTAB-GAN+ cut off outliers at the 600 GPT/l mark whereas NFlow came closer to matching the original distribution. For Hb, CTAB-GAN+, however, mimicked the original distribution better than NFlow which generated fewer outliers to the top of the distribution range. Notably, for age this behavior was not observed, arguably as the original data did not include extreme outliers.

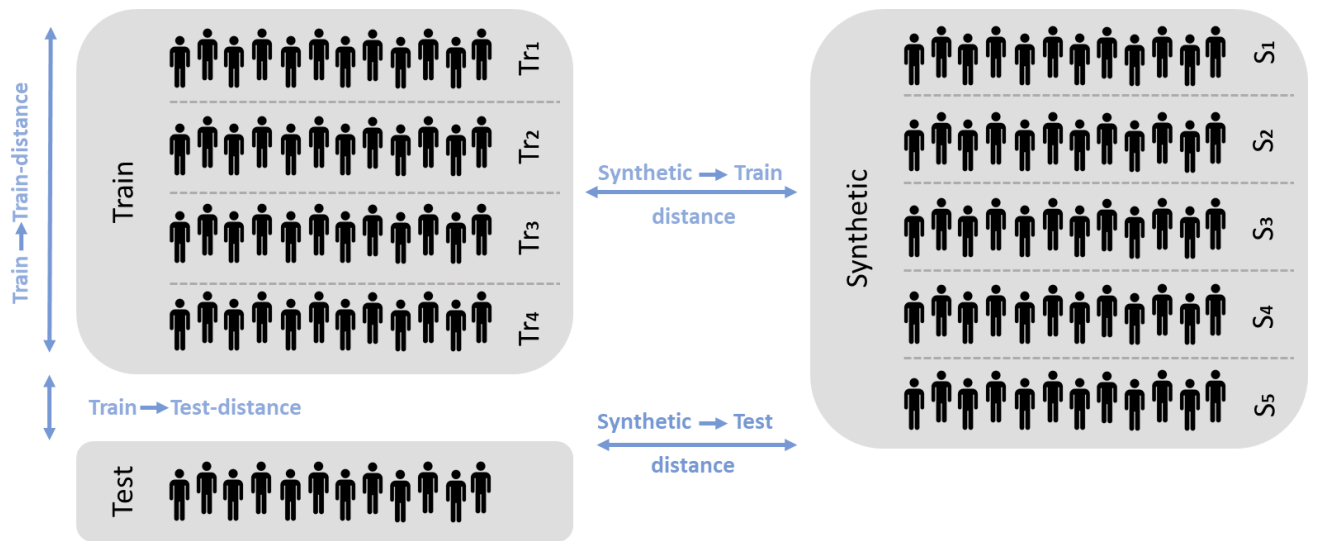

**Supplementary Figure 2 Partitioning of privacy assessment subsets.** Because of the mismatch between training set size (80% of the total cohort) and test set size (20%), both the training set and the synthetic cohort were partitioned into equally sized (20% each) subsets in order to guarantee adequate comparability via Hamming distance calculation.
